# Supplementary material for: Comparison of Pretraining Models and Strategies for Health-Related Social Media Text Classification
Source: MDPI journal article supplement (doi:10.3390/healthcare10081478), 2022-08-05
Supplement: s1 [file s1]

## SUPPLEMENTARY MATERIAL

Each of RoBERTa, BERTweet, and BioBERT has multiple implementations which differ in the model size, the pre-training data size, and the training time. The specific models for RoBERTa, BERTweet and BioBERT we used in our experiments are RoBERTa\_Base, BERTweet\_Base and BioBERT v1.1.

**Table S1.** The full hyper-parameter configurations of the classification model. The maximum sequence size of each model is set as the same as the off-the-shelf model, which is 128 for BERTweet and 512 for the rest models.

| Hyper-parameter       |                    |
|-----------------------|--------------------|
| Number of Layers      | 12                 |
| Hidden size           | 768                |
| FFN inner hidden size | 3072               |
| Attention heads       | 12                 |
| Attention head size   | 64                 |
| Dropout               | 0.1                |
| Attention Dropout     | 0.1                |
| Weight Decay          | 0.01               |
| Learning Rate Decay   | Linear             |
| Adam $\beta_1$        | 0.9                |
| Adam $\beta_2$        | 0.98               |
| Gradient Clipping     | 0                  |
| Batch Size            | 32                 |
| Warmup Ratio          | 0                  |
| Adam Epsilon          | $1 \times 10^{-8}$ |

**Table S2.** The links to access the datasets. For Task 2-3, 7-12 and 15-16, the datasets are not publicly available but can be accessed by sending requests to the dataset creators.

| ID | Task                                                 | Link                                                                                                                          |
|----|------------------------------------------------------|-------------------------------------------------------------------------------------------------------------------------------|
| 1  | ADR Detection                                        | <a href="http://diego.asu.edu/Publications/ADRCClassify.html">http://diego.asu.edu/Publications/ADRCClassify.html</a>         |
| 2  | Breast Cancer                                        | <a href="https://healthlanguageprocessing.org/smm4h-2021/task-8/">https://healthlanguageprocessing.org/smm4h-2021/task-8/</a> |
| 3  | NPMU characterization                                | -                                                                                                                             |
| 4  | WNUT-20-task2 (informative COVID-19 tweet detection) | <a href="https://github.com/VinAIRResearch/COVID19Tweet">https://github.com/VinAIRResearch/COVID19Tweet</a>                   |
| 5  | SMM4H-17-task1 (ADR detection)                       | <a href="https://healthlanguageprocessing.org/sharedtask2/">https://healthlanguageprocessing.org/sharedtask2/</a>             |
| 6  | SMM4H-17-task2 (medication consumption)              |                                                                                                                               |

|    |                                                                        |                                                                                                                               |
|----|------------------------------------------------------------------------|-------------------------------------------------------------------------------------------------------------------------------|
| 7  | SMM4H-21-task1 (ADR detection)                                         | <a href="https://healthlanguageprocessing.org/smm4h-2021/task-1/">https://healthlanguageprocessing.org/smm4h-2021/task-1/</a> |
| 8  | SMM4H-21-task3a (regimen change on Twitter)                            | <a href="https://healthlanguageprocessing.org/smm4h-2021/task-3/">https://healthlanguageprocessing.org/smm4h-2021/task-3/</a> |
| 9  | SMM4H-21-task3b (regimen change on WebMD)                              |                                                                                                                               |
| 10 | SMM4H-21-task4 (adverse pregnancy outcomes)                            | <a href="https://healthlanguageprocessing.org/smm4h-2021/task-4/">https://healthlanguageprocessing.org/smm4h-2021/task-4/</a> |
| 11 | SMM4H-21-task5 (COVID-19 potential case)                               | <a href="https://healthlanguageprocessing.org/smm4h-2021/task-5/">https://healthlanguageprocessing.org/smm4h-2021/task-5/</a> |
| 12 | SMM4H-21-task6 (COVID-19 symptom)                                      | <a href="https://healthlanguageprocessing.org/smm4h-2021/task-6/">https://healthlanguageprocessing.org/smm4h-2021/task-6/</a> |
| 13 | Suicidal Ideation Detection                                            | <a href="https://zenodo.org/record/4278895#.YT_KL1PokWo">https://zenodo.org/record/4278895#.YT_KL1PokWo</a>                   |
| 14 | Drug Addiction and Recovery Intervention                               | <a href="https://zenodo.org/record/4543776#.YUJW-FPokWo">https://zenodo.org/record/4543776#.YUJW-FPokWo</a>                   |
| 15 | eRisk-21-task1 (Signs of Pathological Gambling)                        | <a href="https://early.irlab.org/">https://early.irlab.org/</a>                                                               |
| 16 | eRisk-21-task2 (Signs of Self-Harm)                                    |                                                                                                                               |
| 17 | Sentiment Analysis in e-Health Forums (Food Allergy Related)           | <a href="https://zenodo.org/record/1479354#.YVHTeFPokWo">https://zenodo.org/record/1479354#.YVHTeFPokWo</a>                   |
| 18 | Sentiment Analysis in e-Health Forums (Crohn'S Disease Related)        |                                                                                                                               |
| 19 | Sentiment Analysis in e-Health Forums (Breast Cancer Related)          |                                                                                                                               |
| 20 | Factuality Classification in e-Health Forums (Food Allergy Related)    |                                                                                                                               |
| 21 | Factuality Classification in e-Health Forums (Crohn'S Disease Related) |                                                                                                                               |
| 22 | Factuality Classification in e-Health Forums (Breast Cancer Related)   |                                                                                                                               |
